# Supplementary material for: Detection of Benzo[a]pyrene Diol Epoxide Adducts to Histidine and Lysine in Serum Albumin In Vivo by High-Resolution-Tandem Mass Spectrometry
Source: MDPI journal article supplement (doi:10.3390/toxics10010027), 2022-01-08
Supplement: s1 [file s1]

# Supplementary Materials: Detection of benzo[a]pyrene diol epoxide adducts to histidine and lysine in serum albumin *in vivo* by high-resolution-tandem mass spectrometry

Javier Zurita, Hitesh V. Motwani, Leopold L. Ilag, Vassilis L. Souliotis, Soterios A. Kyrtopoulos, Ulrika Nilsson and Margareta Törnqvist

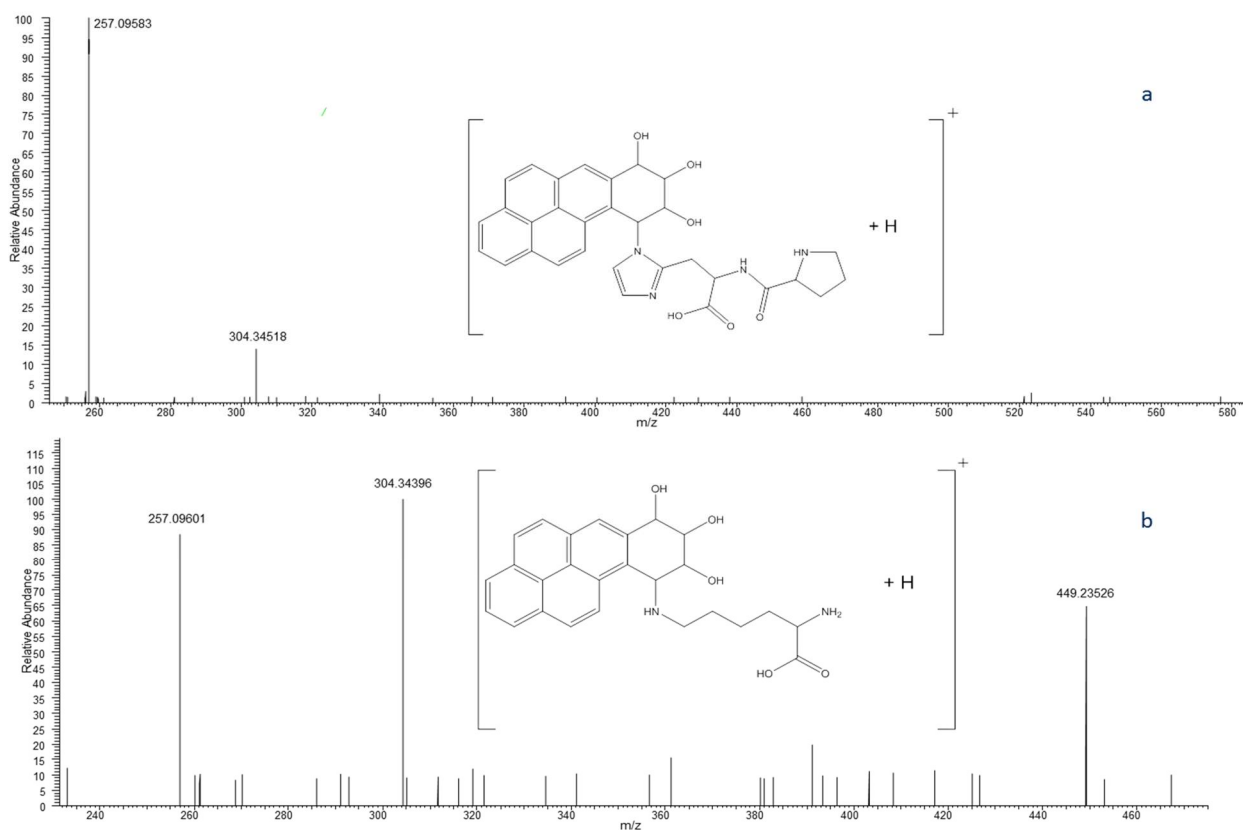

**Figure S1.** MS/MS spectra showing fragmentation pattern of standard compounds of (a) (+/-)-BPDE-His-Pro and (b) (+/-)-BPDE-Lys obtained from *in vitro* alkylated human SA.

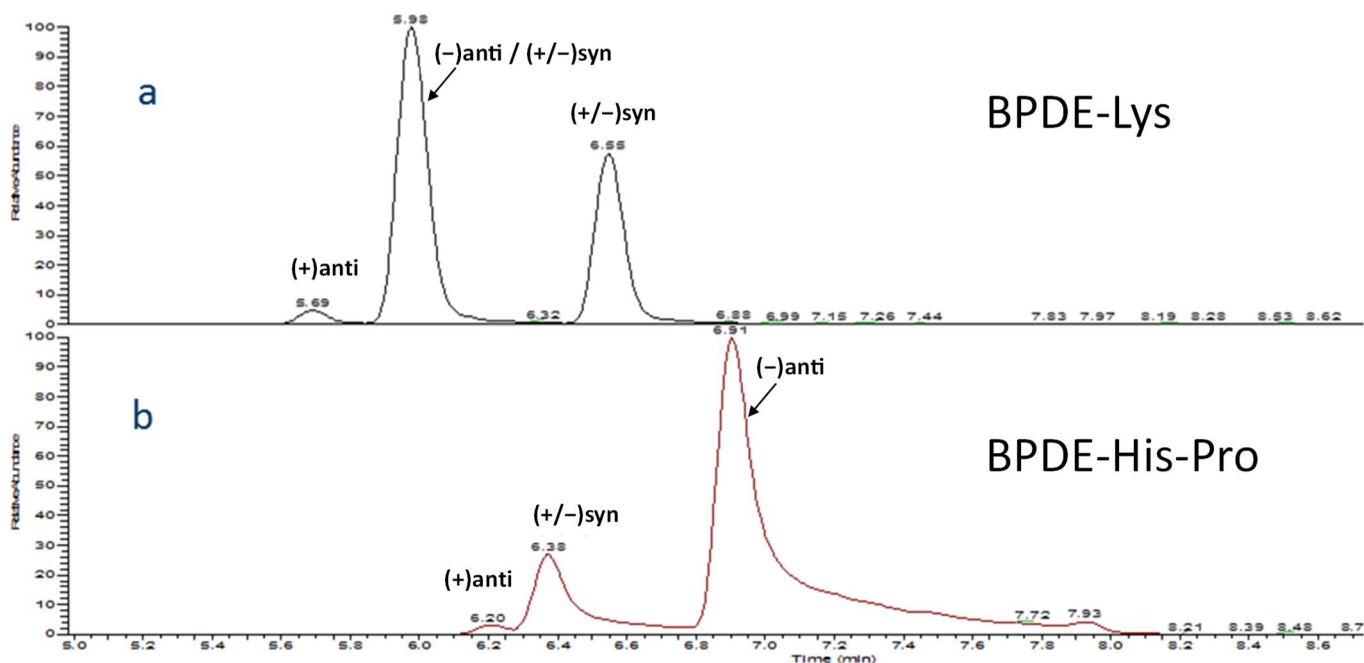

**Figure S2.** Extracted ion chromatograms using the common fragment ion at  $m/z$  257.0961 showing separation of the studied adducts from the standard of *in vitro* alkylated SA. Separation was done on a  $C_{18}$ -HPLC analytical column and employing Orbitrap tandem HRMS (PRM mode). **a)** Lys adducts and **b)** His adducts, with  $[M + H]^+$  monitored at  $m/z$  449.2 and 555.2, respectively.

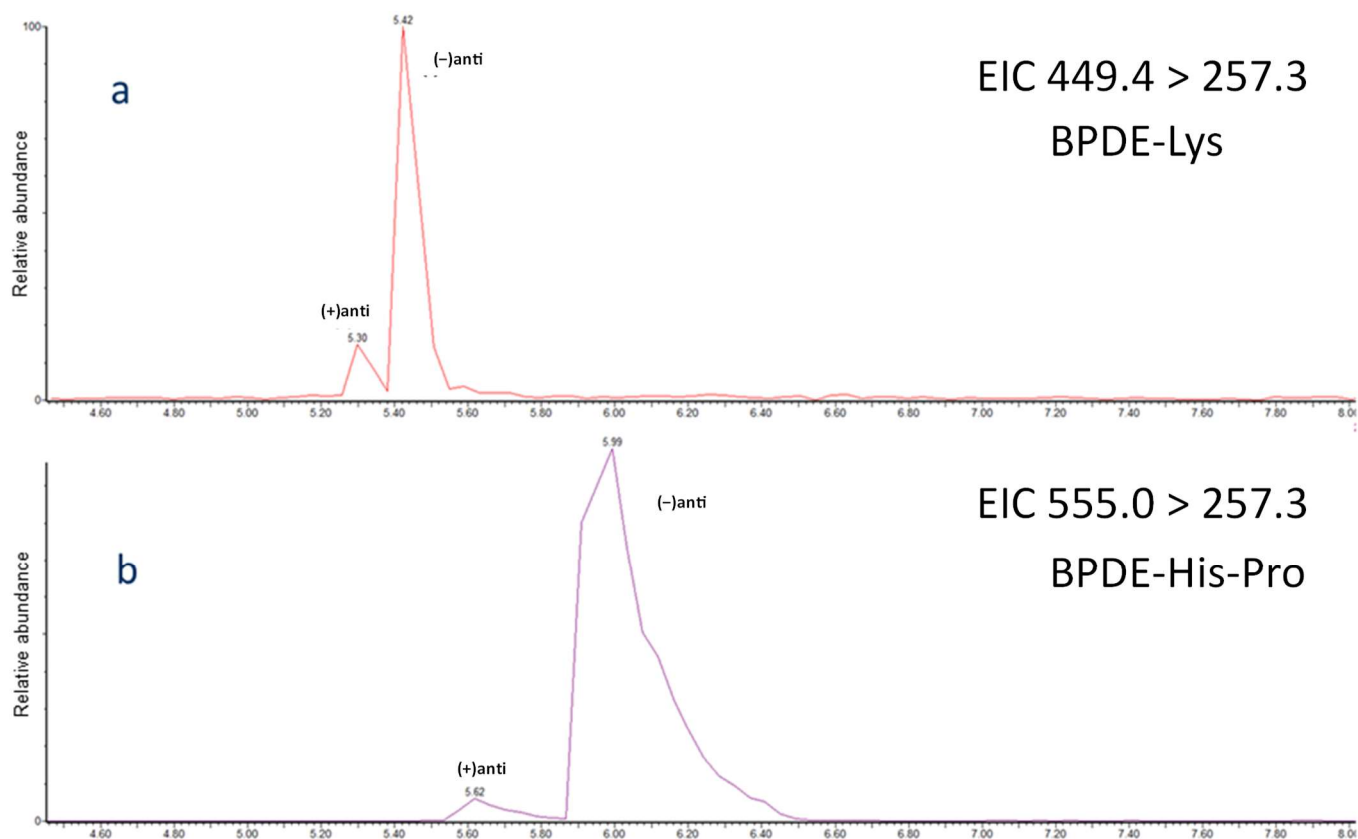

**Figure S3.** Extracted ion chromatograms, showing (+/-)-anti-BPDE-adduct references from the standard of *in vitro* alkylated SA, employing a  $C_{18}$  column coupled to triple-quadrupole MS/MS (MRM mode). Lys adducts (**a**) and His adducts (**b**) are observed (with a poor signal compared to that observed with Orbitrap MS, as shown in Figure S2).

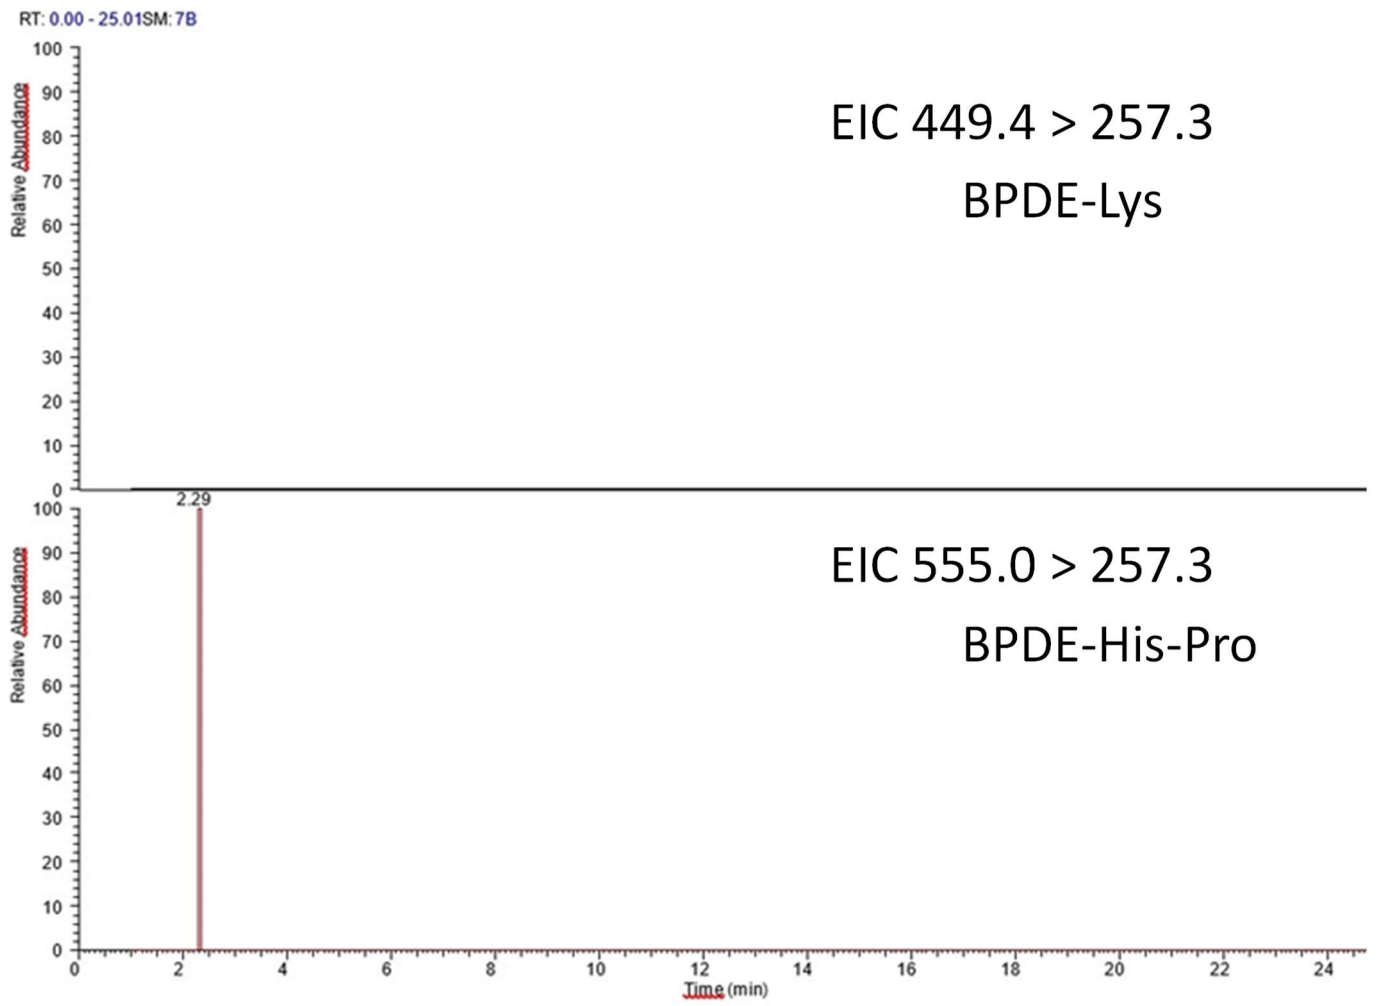

**Figure S4.** Extracted ion chromatogram of SA from control mouse (non-alkylated, 10 mg SA).

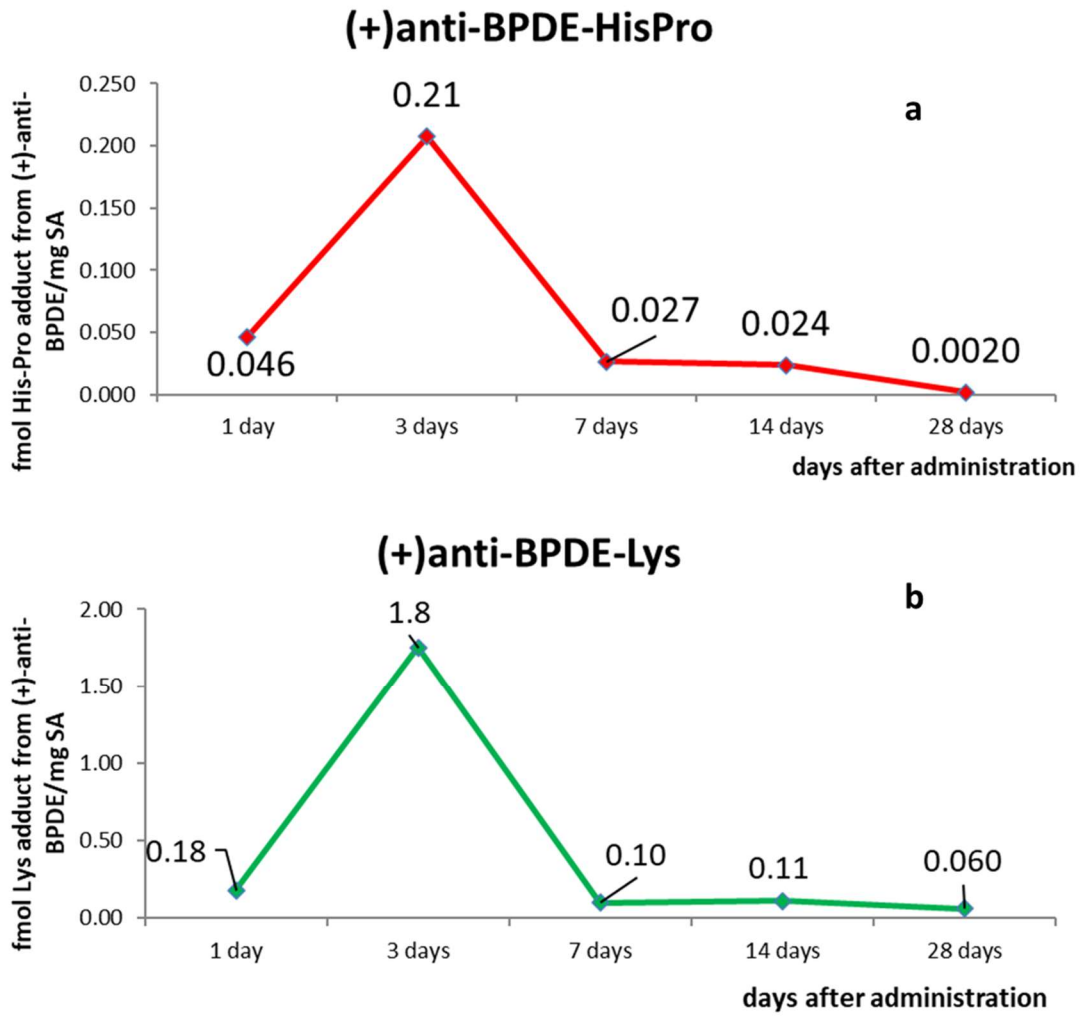

**Figure S5.** Levels of adducts to His (a) and Lys (b) from (+)-anti-BPDE in mice euthanized at different days after exposure to benzo[a]pyrene (100 mg/kg of body weight). Mean values in two exposed mice from each day are shown (half LOD used when level below LOD).

## BPDE-His-Pro

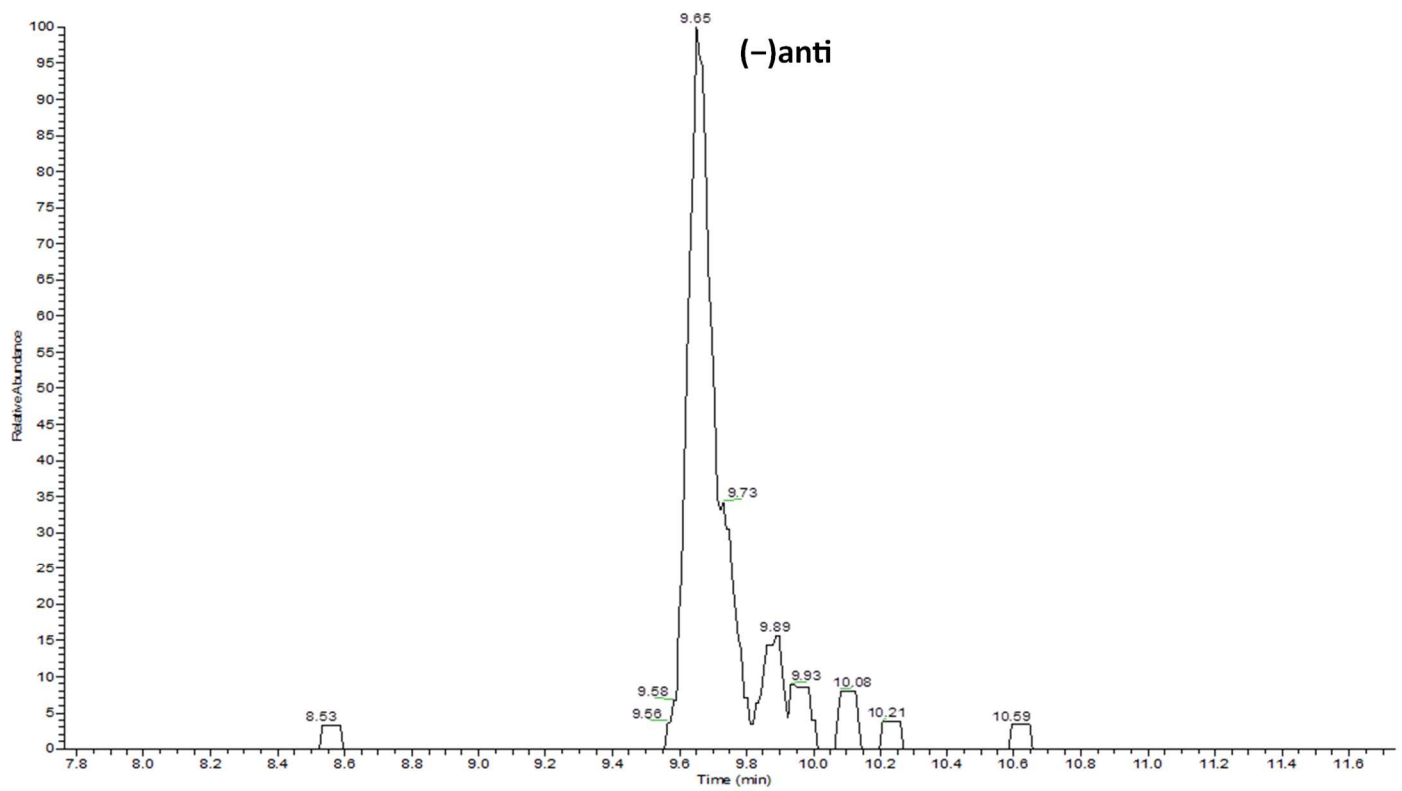

**Figure S6.** Extracted ion chromatogram showing (-)-anti-BPDE-His-Pro in a second human SA (10 mg) sample. Separation was performed on an F5 HPLC column and using Orbitrap tandem HRMS (PRM mode).
